# Supplementary material
Source: PubMed Central journal article supplement (PMC7482252)
Supplement: ao0c03220_si_001.pdf [file ao0c03220_si_001.pdf]

# Supporting information

## Synthesis and Efficacy of the N-carbamoyl-methionine copper on the growth performance, tissue mineralization, immunity and enzymatic antioxidant capacity of Nile tilapia (*Oreochromis niloticus*)

Fan Luo<sup>†</sup>, Wenxiong Wang<sup>§</sup>, Meiquan Chen<sup>†</sup>, Zhanjia Zheng<sup>†</sup>, Dandan Zeng<sup>†</sup>, Murtaza Hasan<sup>†\*</sup>, Zhihuan Fu<sup>†\*</sup>,  
and Xugang Shu<sup>†\*\*</sup>

<sup>†</sup> School of Chemistry and Chemical Engineering, Zhongkai University of Agriculture and Engineering, Guangzhou, 510225, P.R. China.

<sup>‡</sup> Guangdong Province Key Laboratory of Waterfowl Healthy Breeding, Guangzhou 510225, China.

<sup>§</sup>Department of Ocean Science, The Hong Kong University of Science and Technology (HKUST), Kowloon, Hong Kong

<sup>Ω</sup> Department of Biochemistry and Biotechnology, The Islamia University Bahawalpur, 61300, Pakistan

### \*Corresponding authors:

#### Murtaza Hasan PhD (Post Doc)

Department of Biochemistry and Biotechnology,  
The Islamia University, Bahawalpur, Pakistan

Email. [murtaza@iub.edu.pk](mailto:murtaza@iub.edu.pk)

Email. [murtaza@zhku.edu.cn](mailto:murtaza@zhku.edu.cn)

#### Professor Xugang Shu

School of Chemistry and Chemical Engineering,

Zhongkai University of Agriculture and Engineering, Guangzhou, 510225, P.R. China.

Email: [xgshu@21cn.com](mailto:xgshu@21cn.com)

Phone: 86-020-8900-3114, Fax: 86-020-8900-3114.

## **Supporting information content:**

1. Effects of different Cu sources as the experimental diets on metal elemental concentration changes in muscle of *Oreochromis niloticus*.
2. Effects of different Cu sources as the experimental diets on metal elemental concentration changes in liver of *Oreochromis niloticus*.
3. Effects of different Cu sources as the experimental diets on metal elemental concentration changes in gill of *Oreochromis niloticus*.
4. Effects of different Cu sources as the experimental diets on metal elemental concentration changes in intestine of *Oreochromis niloticus*.

**Effects of different Cu sources as the experimental diets on metal elemental concentration changes in muscle of *Oreochromis niloticus***

**Table S1. Effects of different Cu sources as the experimental diets on metal elemental concentration changes in muscle of *Oreochromis niloticus***

| Experimental diets      | Concentration (mg/kg)  |                         |                         |                        |
|-------------------------|------------------------|-------------------------|-------------------------|------------------------|
|                         | Cu                     | Zn                      | Fe                      | Mn                     |
| Blank group             | 3.90±0.22 <sup>b</sup> | 20.92±2.20 <sup>b</sup> | 23.52±6.49 <sup>b</sup> | 1.71±0.23 <sup>b</sup> |
| CuSO <sub>4</sub> group | 3.47±0.14 <sup>a</sup> | 21.91±0.17 <sup>b</sup> | 23.06±3.95 <sup>b</sup> | 1.10±0.06 <sup>a</sup> |
| NCM-Cu group            | 4.99±0.21 <sup>c</sup> | 15.97±0.55 <sup>a</sup> | 16.94±2.23 <sup>a</sup> | 1.00±0.05 <sup>a</sup> |

All the data means ±SD (n=3) in triplicate, means in the same column with different superscript letters are significantly different (P<0.05).

## 1. Effects of different Cu sources as the experimental diets on metal elemental concentration changes in liver of *Oreochromis niloticus*

Table S2. Effects of different Cu sources as the experimental diets on metal elemental concentration changes in liver of *Oreochromis niloticus*

| Experimental diets      | Concentration (mg/kg)     |                         |                          |                        |
|-------------------------|---------------------------|-------------------------|--------------------------|------------------------|
|                         | Cu                        | Zn                      | Fe                       | Mn                     |
| Blank group             | 113.80±21.60 <sup>a</sup> | 51.94±2.06 <sup>b</sup> | 315.08±7.95 <sup>b</sup> | 3.92±0.45 <sup>b</sup> |
| CuSO <sub>4</sub> group | 144.57±13.73 <sup>b</sup> | 46.55±3.78 <sup>b</sup> | 322.15±4.29 <sup>b</sup> | 3.30±0.32 <sup>a</sup> |
| NCM-Cu group            | 154.34±19.00 <sup>b</sup> | 43.27±2.79 <sup>a</sup> | 300.74±6.18 <sup>a</sup> | 3.34±0.24 <sup>a</sup> |

All the data means ±SD (n=3) in triplicate, means in the same column with different superscript letters are significantly different (P<0.05).

**2. Effects of different Cu sources as the experimental diets on metal elemental concentration changes in gill of *Oreochromis niloticus***

**Table S3. Effects of different Cu sources as the experimental diets on metal elemental concentration changes in gill of *Oreochromis niloticus***

| Experimental diets      | Concentration (mg/kg)  |                          |              |           |
|-------------------------|------------------------|--------------------------|--------------|-----------|
|                         | Cu                     | Zn                       | Fe           | Mn        |
| Blank group             | 5.75±0.08 <sup>b</sup> | 69.30±4.23 <sup>ab</sup> | 195.50±32.76 | 7.21±0.18 |
| CuSO <sub>4</sub> group | 5.49±0.35 <sup>a</sup> | 74.35±2.17 <sup>b</sup>  | 209.69±4.44  | 6.54±0.79 |
| NCM-Cu group            | 7.18±0.05 <sup>c</sup> | 67.99±6.89 <sup>a</sup>  | 178.16±58.57 | 6.94±0.65 |

All the data means ±SD (n=3) in triplicate SD (n=3) in triplicate, means in the same column with different superscript letters are significantly different (P<0.05).

### 3. Effects of different Cu sources as the experimental diets on metal elemental concentration changes in intestine of *Oreochromis niloticus*

**Table S4. Effects of different Cu sources as the experimental diets on metal elemental concentration changes in intestine of *Oreochromis niloticus***

| Experimental diets      | Concentration (mg/kg)  |                         |                           |                         |
|-------------------------|------------------------|-------------------------|---------------------------|-------------------------|
|                         | Cu                     | Zn                      | Fe                        | Mn                      |
| Blank group             | 7.39±0.50 <sup>a</sup> | 74.85±1.13 <sup>b</sup> | 129.15±2.58 <sup>b</sup>  | 15.61±0.78 <sup>b</sup> |
| CuSO <sub>4</sub> group | 8.29±0.36 <sup>b</sup> | 75.13±0.55 <sup>b</sup> | 101.57±3.48 <sup>a</sup>  | 12.29±0.07 <sup>a</sup> |
| NCM-Cu group            | 8.48±0.17 <sup>b</sup> | 70.15±1.76 <sup>a</sup> | 155.56±30.68 <sup>c</sup> | 12.41±0.86 <sup>a</sup> |

All the data means ±SD (n=3) in triplicate, means in the same column with different superscript letters are significantly different (P<0.05).
